# Supplementary material
Source: publisher figshare collection journal article supplement (https://tandf.figshare.com/ndownloader/files/22790384)
Supplement: Supplementary file 1 [file 22790384]

**Supporting Information**

Two new copper(II) complexes based on 4-(1*H*-1,2,4-triazol-1-yl)phenol and different co-ligands: Synthesis, crystal structures, luminescent properties and magnetic behavior

HONG-KUN ZHAO*, HAN-WEN YANG, ZHONG-YI LIU, XIU-GUANG WANG*, EN-CUI YANG, XIAO-JUN ZHAO and FANG JIA





Figure S1. Simulated (blue) and experimental (red) X-ray powder diffraction patterns for **1**.





Figure S2. Simulated (blue) and experimental (red) X-ray powder diffraction patterns for **2**.


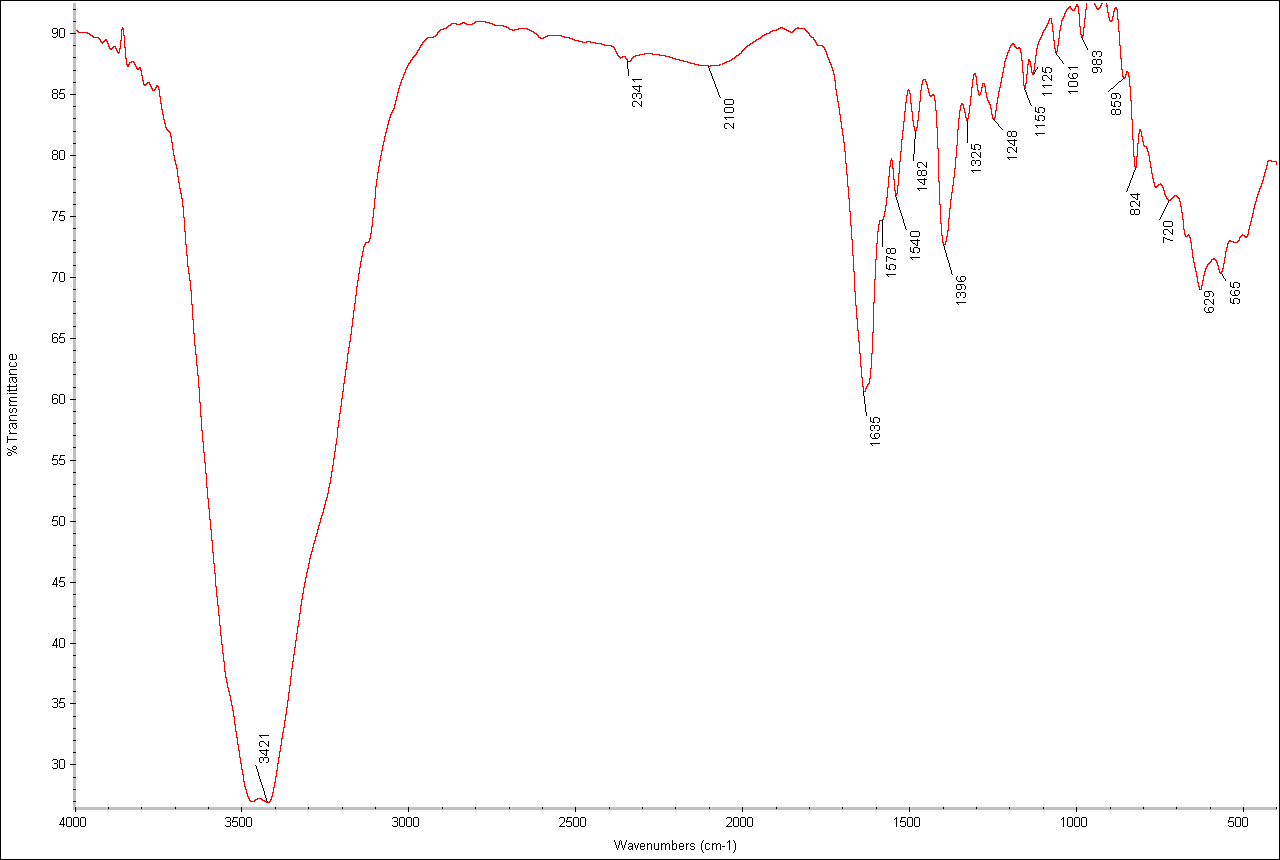


Figure S3. FT-IR spectra for **1**.


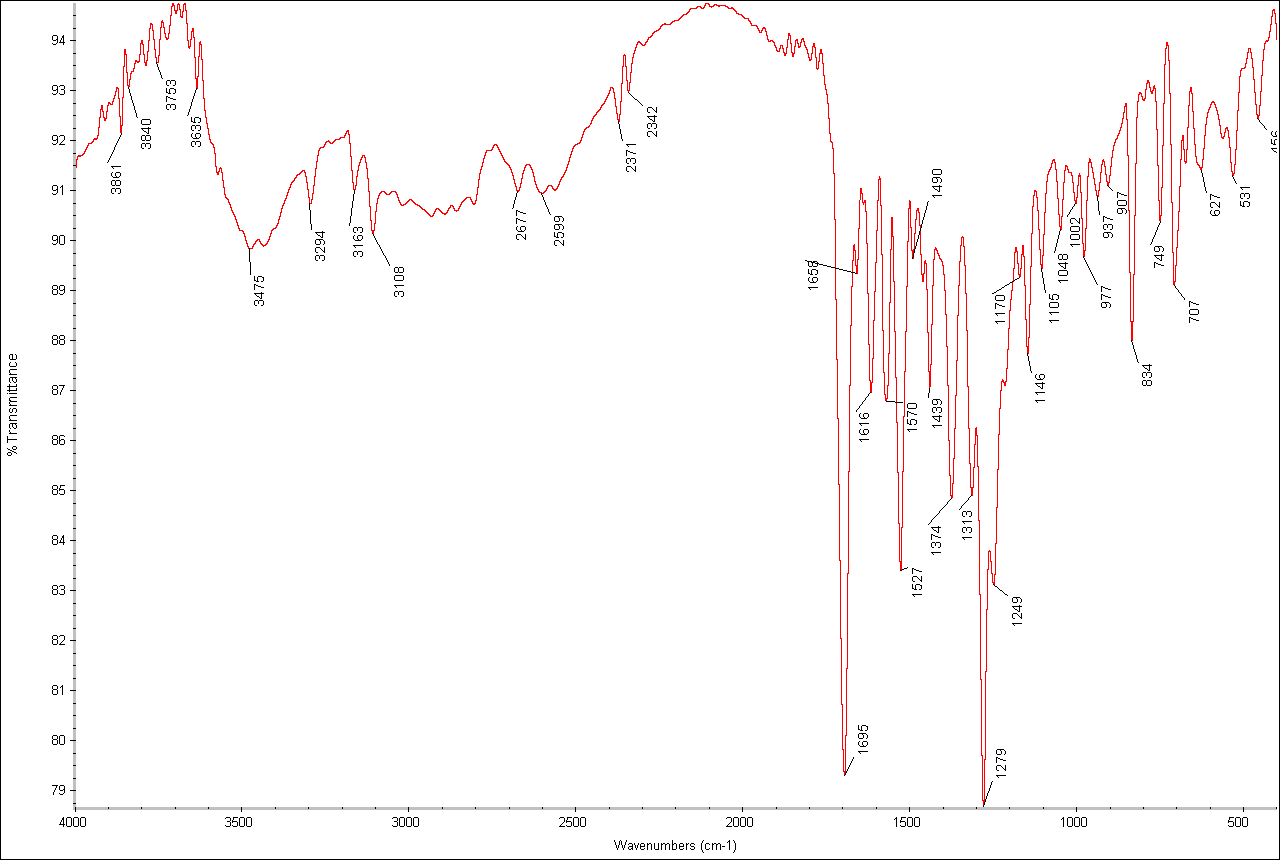


Figure S4. FT-IR spectra for **2**.

Table S1. Selected bond lengths (Å) and angles (deg) for **1** and **2**.

| **1** |  |  |  |
| --- | --- | --- | --- |
| Cu(1)–O(2) | 1.9572(15) | Cu(1)–O(6) | 1.9601(16) |
| Cu(1)–O(5)#1 | 1.9934(15) | Cu(1)–N(3) | 2.0160(18) |
| Cu(1)–O(7) | 2.2939(17) |  |  |
| O(2)–Cu(1)–O(6) | 175.40(7) | O(2)–Cu(1)–O(5)#1 | 85.99(6) |
| O(6)–Cu(1)–O(5)#1 | 93.89(7) | O(2)–Cu(1)–N(3) | 88.32(7) |
| O(6)–Cu(1)–N(3) | 91.44(7) | O(5)#1–Cu(1)–N(3) | 172.91(7) |
| O(2)–Cu(1)–O(7) | 92.51(7) | O(6)–Cu(1)–O(7) | 92.09(7) |
| O(5)#1–Cu(1)–O(7) | 88.90(7) | N(3)–Cu(1)–O(7) | 95.58(7) |
| **2** |  |  |  |
| Cu(1)–O(2) | 1.9533(17) | Cu(1)–N(3) | 1.985(2) |
| Cu(1)–O(2)#1 | 1.9533(17) | Cu(1)–N(3)#1 | 1.985(2) |
| O(2)–Cu(1)–O(2)#1 | 180.00(10) | O(2)–Cu(1)–N(3) | 87.91(8) |
| O(2)–Cu(1)–N(3)#1 | 92.09(8) | O(2)#1–Cu(1)–N(3)#1 | 87.91(8) |
| O(2)#1–Cu(1)–N(3) | 92.09(7) | N(3)–Cu(1)–N(3)#1 | 180 |

*a*Symmetry codes for **1**:*#*1 *x*, *y*–1, *z*; for **2**: *#*1 –*x*, –*y*+1, –*z*+1

Table S2. Hydrogen bond lengths (Å) and angles () for **1** and **2**.

| Donor–H···Acceptor | D–H | H···A | D···A | D–H···A |
| --- | --- | --- | --- | --- |
| **1** |  |  |  |  |
| O7–H7B···O1*#1* | 0.85 | 2.09 | 2.903(3) | 161 |
| O6–H6A···O3*#2* | 0.85 | 1.90 | 2.736(2) | 166 |
| O7–H7A···O8*#3* | 0.85 | 2.02 | 2.861(3) | 171 |
| O1–H1···O8*#4* | 0.82 | 1.91 | 2.728(3) | 175 |
| O8–H8A···O2*#5* | 0.85 | 2.10 | 2.923(3) | 162 |
| O8–H8B···N2 | 0.85 | 2.13 | 2.948(0) | 161 |
| **2** |  |  |  |  |
| O1–H1···O3*#1* | 0.82 | 1.79 | 2.604(3) | 175 |
| O5–H5···O4*#2* | 0.82 | 1.81 | 2.623(0) | 173 |
| O6–H6···O7*#3* | 0.82 | 1.82 | 2.646(4) | 178 |

Symmetry codes for **1**: #1 x+1/2, –y-1/2, z-1/2; #2 –x+1/2, –y+1/2, –z+1; #3 x, y–1, z; #4 –x+1, –y+1, – z+1; #5–x+1/2, y+1/2, –z+1/2; for **2**: #1 x, y–1, z; #2 –x+2, –y+1, -z; #3 –x, –y, –z
